# Supplementary material
Source: Research Square preprint supplement (doi:10.21203/rs.3.rs-8643236/v1)
Supplement: Supplementary file 1 [file 1f90ec5881c1eba9efcb471b.docx]

**Supplementary file 1: Figure S1**. Photographs of sampling sites, snail counting, identification, and cercarial shedding techniques


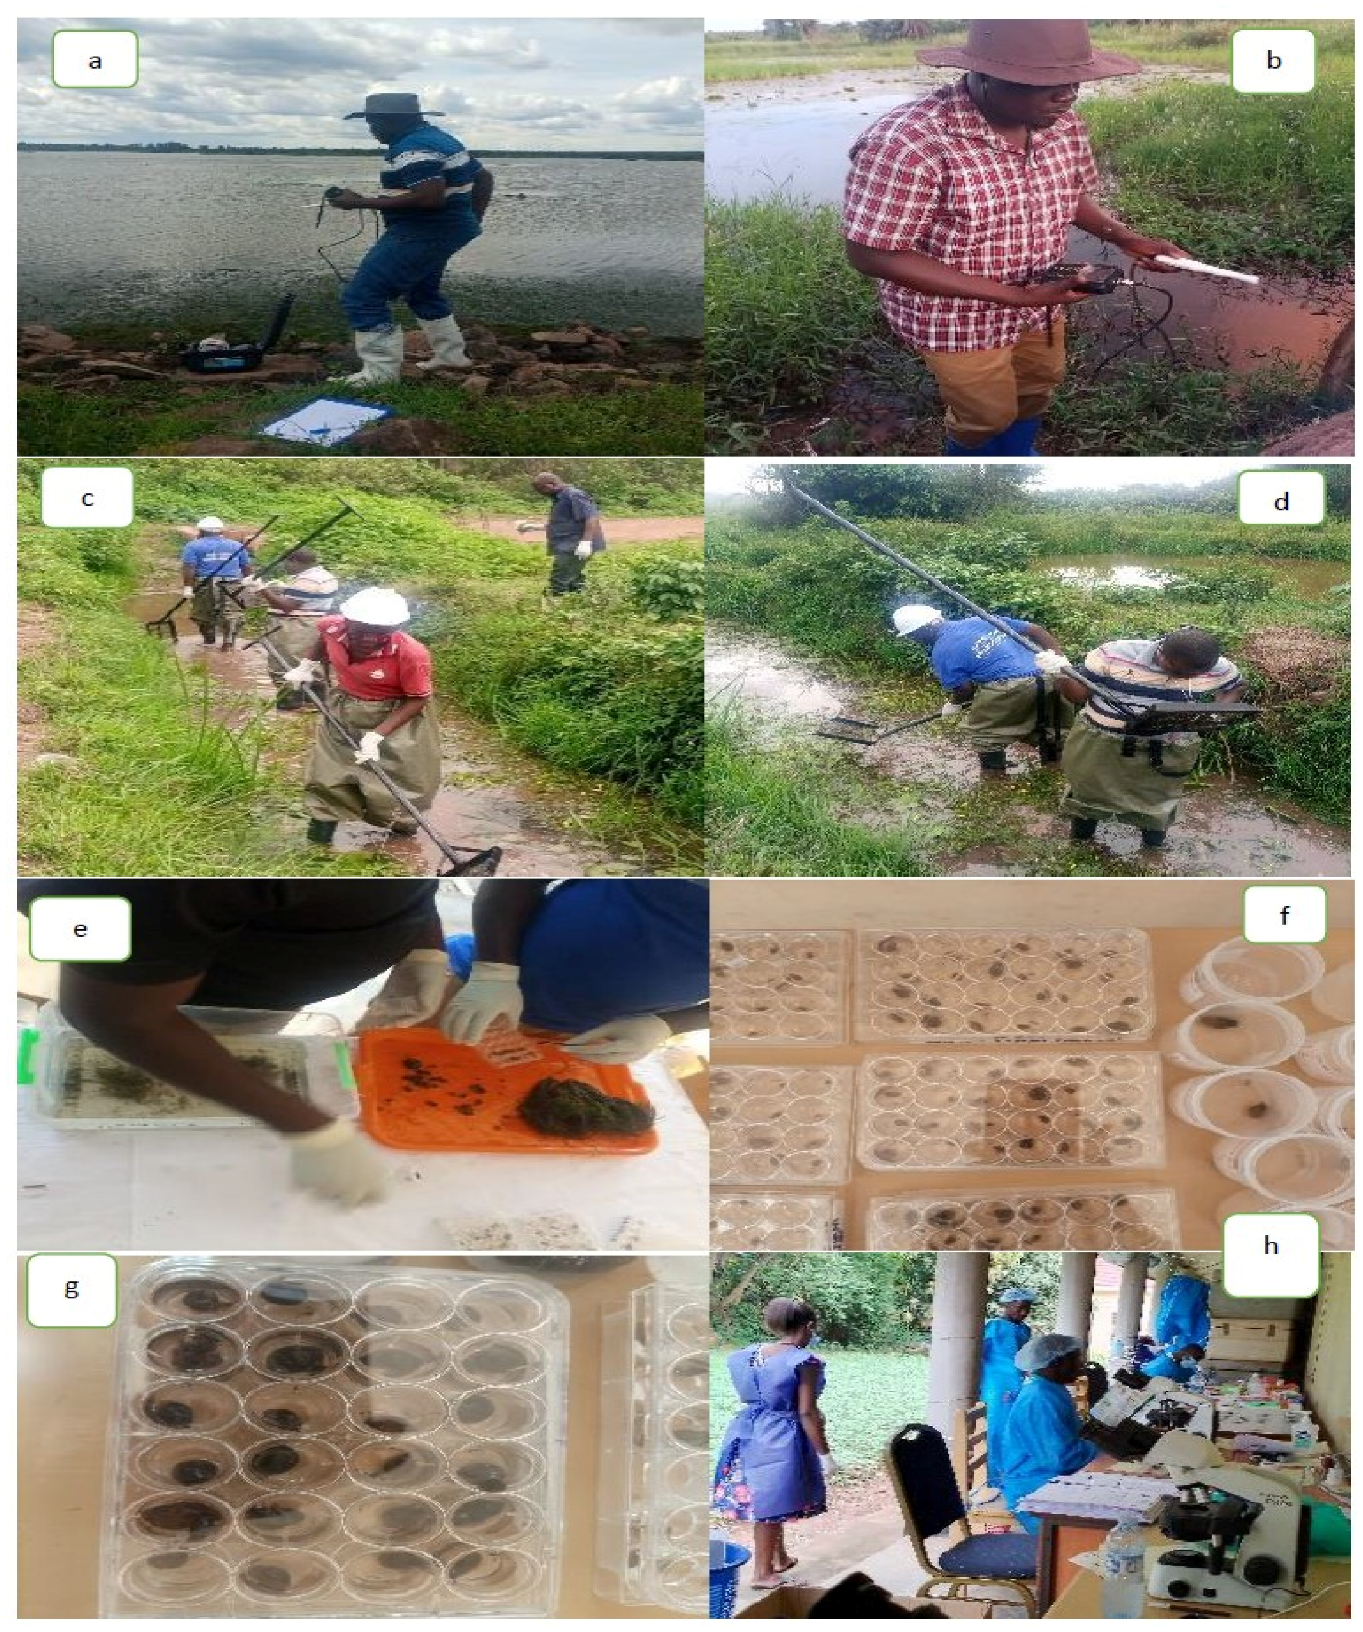


**Fig. S1:** Physicochemical water quality testing (a, b), Snail scoping and handpicking (c, d), morphological snail identification (e), snails exposed to light in shedding wells (f, g), and cercarial identification under a dissecting microscope (h).
