# Supplementary material
Source: Research Square preprint supplement (doi:10.21203/rs.3.rs-8643236/v1)
Supplement: Supplementary file 2 [file 247fff021b250f592afe10b9.docx]

**Supplementary file 2: Figure S2**. Photographs of intermediate freshwater snails collected and identified morphologically to species levels.


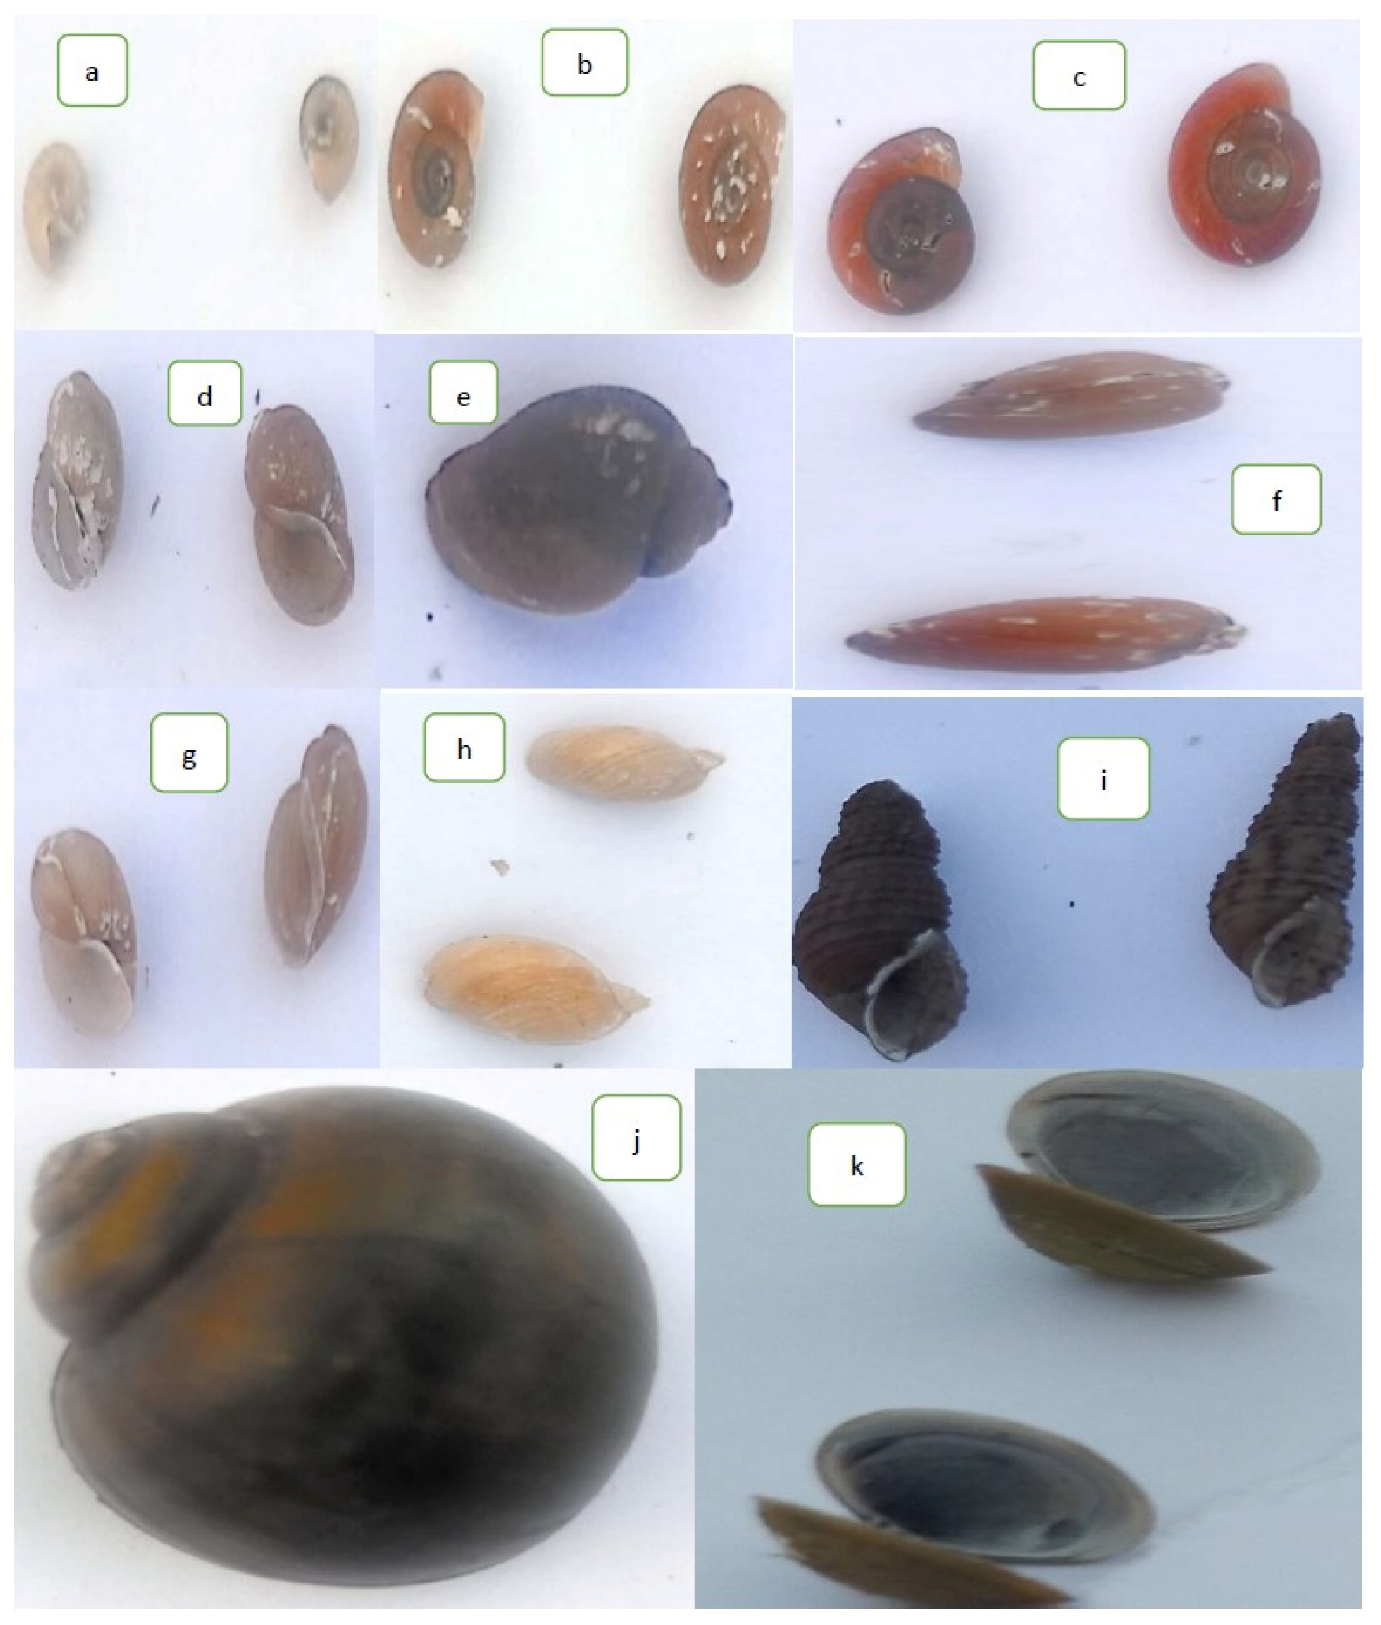


**Fig. S2:** Snail species a (*Biomphalaria choanomphala)*, b (*B. pfeifferi*), c (*B. sudanica)*, d (*Bulinus africanus)*, e (*B. nasutus),* f (*B. globosus)*, g (*B. ugandae)*, h (*Lymnaea natalensis)*, i (*Mellanoides tuberculate)*, (j) (*Pila ovata)* and k (*Bivalves) were identified*.
